# Supplementary material for: Exploration of new ferromagnetic, semiconducting and biocompatible Nb3X8(X = Cl, Br or I) monolayers with considerable visible and infrared light absorption
Source: Royal Society of Chemistry journal article supplement (doi:10.1039/c6nr07231c), 2016-12-26
Supplement: c6nr07231c1.pdf [file c6nr07231c1.pdf]

Supporting Information for

## **Exploration of New Ferromagnetic, Semiconducting and Biocompatible Nb<sub>3</sub>X<sub>8</sub> (X=Cl, Br or I) Monolayers with Considerable Visible and Infrared Light Absorption**

Junke Jiang,<sup>1,2,†</sup> Qihua Liang,<sup>2,†</sup> Ruishen Meng,<sup>2</sup> Qun Yang,<sup>1</sup> Chunjian Tan,<sup>1</sup> Xiang Sun,<sup>1,2</sup> and Xianping Chen<sup>1,2,\*</sup>

<sup>1</sup>Key Laboratory of Optoelectronic Technology & Systems, Education Ministry of China, Chongqing University and College of Optoelectronic Engineering, Chongqing University, Chongqing 400044, China

<sup>2</sup>School of Mechanical and Electrical Engineering, Guilin University of Electronic Technology, Guilin 541004, China

† These authors contributed equally to this work.

\*Correspondence and requests for materials should be addressed to X.P.C. (e-mail: xianpingchen@cqu.edu.cn).

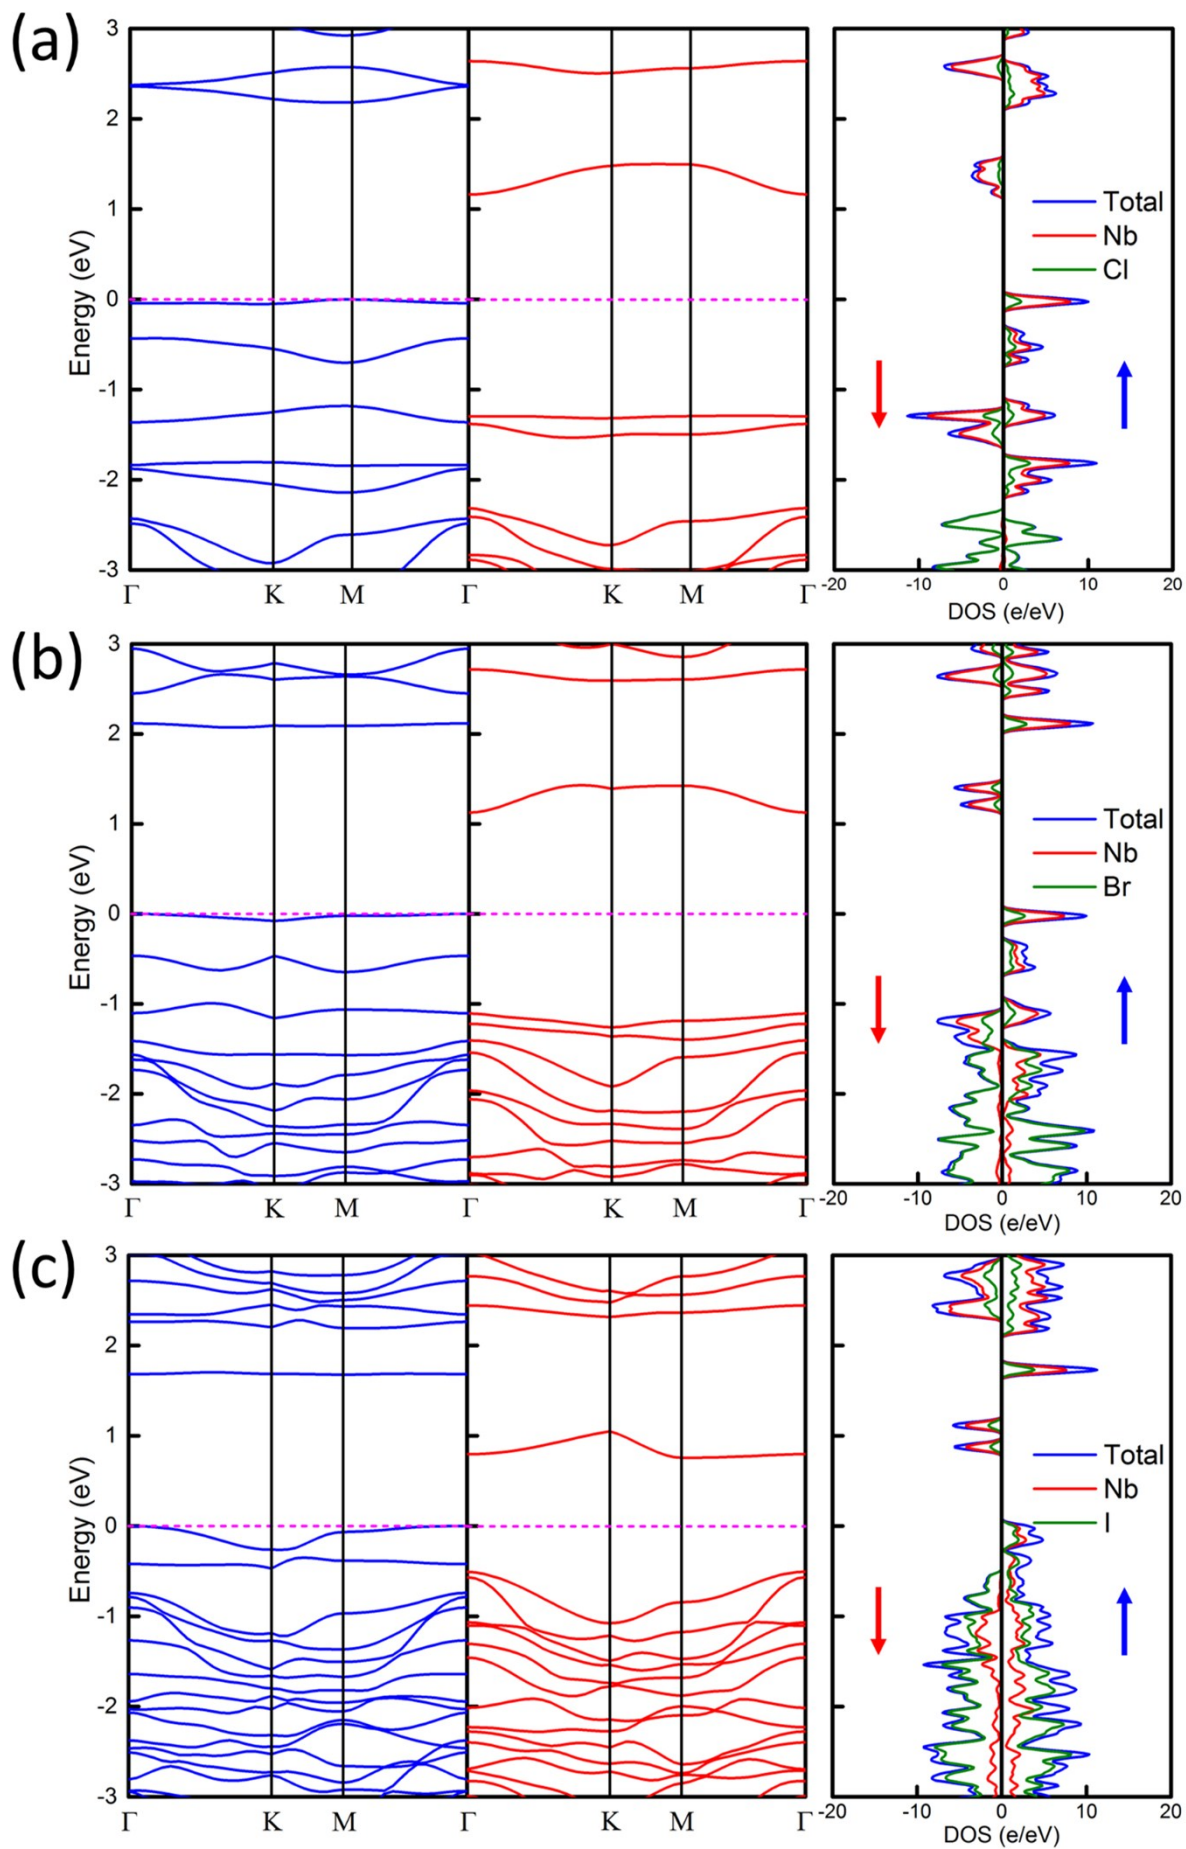

**Fig. S1.** Band structure and corresponding density of states of (a)  $\text{Nb}_3\text{Cl}_8$ , (b)  $\text{Nb}_3\text{Br}_8$  and (c)  $\text{Nb}_3\text{I}_8$  monolayers calculated in HSE06 theoretical level, respectively.

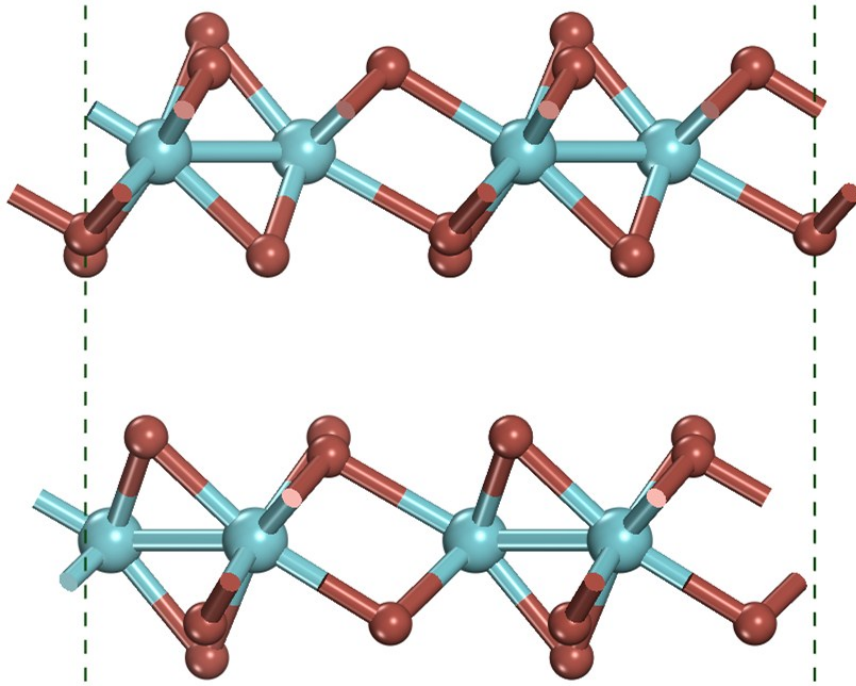

**Fig. S2.** Side view of optimized geometries of Nb<sub>3</sub>I<sub>8</sub> bilayer.

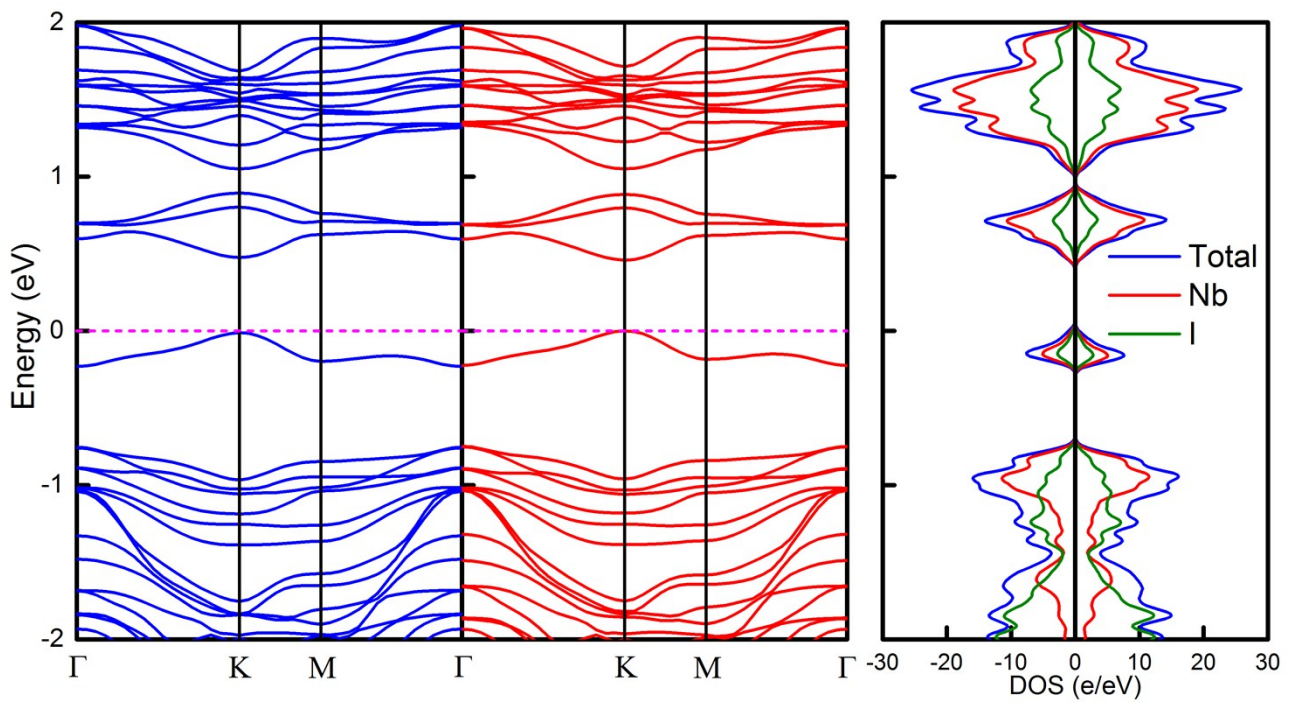

**Fig. S3.** Band structure and corresponding density of states of Nb<sub>3</sub>I<sub>8</sub> bilayer.

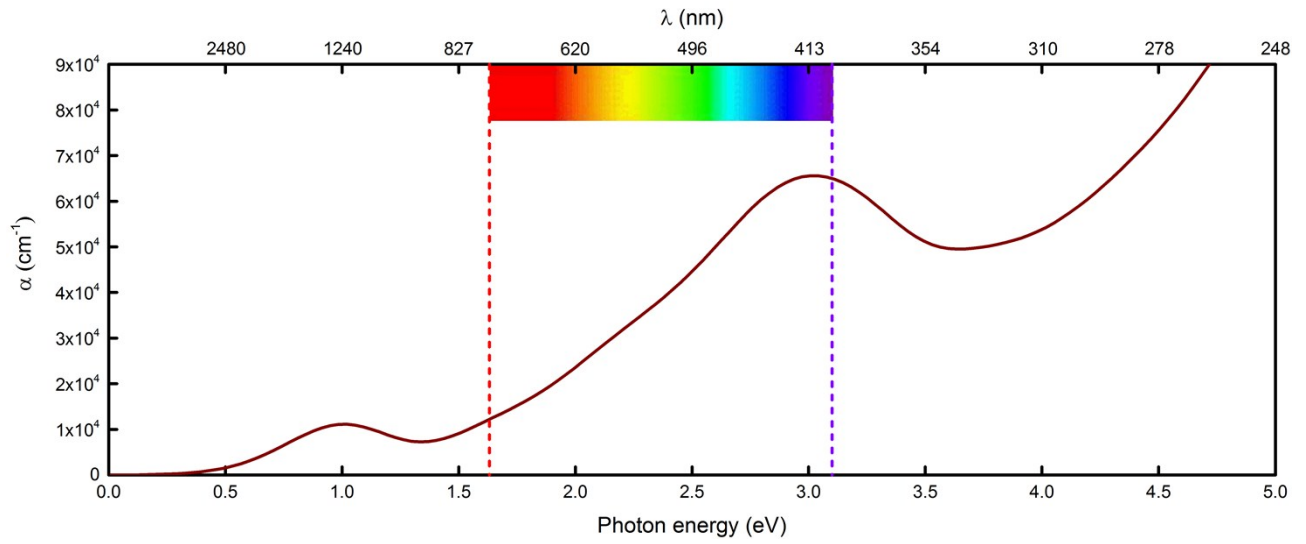

**Fig. S4** Optical absorption coefficients  $\alpha$  for  $\text{Nb}_3\text{I}_8$  bilayer. The seven-colour-light area between the red and the purple lines represents the visible light range.
